# Supplementary material for: Functional Gene Network of Prenyltransferases in Arabidopsis thaliana
Source: MDPI journal article supplement (doi:10.3390/molecules24244556), 2019-12-12
Supplement: s1 [file s1]

|                |   |                                                     |
|----------------|---|-----------------------------------------------------|
| CPT1_At2g23410 | 1 | MLSL-----LSSDSSL                                    |
| CPT2_At2g23400 | 1 | MLSL-----LST---LV                                   |
| CPT6_At5g58780 | 1 | MLSI-----LSS---LL                                   |
| CPT7_At5g58770 | 1 | MLSL-----RVPTPTSDFRFRYQAGDLERRWRLS                  |
| CPT8_At5g58782 | 1 | MNFMIHANHLLVFLTLSTM-----LSMLWFL                     |
| CPT9_At5g58784 | 1 | MLSL-----FSVVFTRL                                   |
| CPT3_At2g17570 | 1 | MAEL-----PGQIRHIGGRMSQLLEQIYGFS---                  |
| CPT4_At5g60510 | 1 | MNNT-----REEV---GEFTQIFNALMSLM---                   |
| CPT5_At5g60500 | 1 | MN-T-----LEEVE---DESTHIFNALMSLM---                  |
| LEW1_At1g11755 | 1 | MDSNQSMRLLSAWIGQIGDLGLNLLWRFIHIVVSLWYIVSGIFEAE----- |

|                |    |                                                                         |
|----------------|----|-------------------------------------------------------------------------|
| CPT1_At2g23410 | 13 | SLLFLFLIPCLFITSYIGFPVF--LLKLIGLIKIKAAARD---NEKRDEGTYVVDREDA-----LQRELMR |
| CPT2_At2g23400 | 10 | ALPFLFLIPCLFITSYICFPVF--LTKLLGLIKFKAARDDDDNEKRDEATCVVREEE-----LQRELMR   |
| CPT6_At5g58780 | 10 | SLLFLFIISCFITSHFWFPLS--LPKILGFIKITSSRDYDNEQRDEGTYVVGVEE-----LQRELMR     |
| CPT7_At5g58770 | 30 | RDSFLSFSP-----KFEENRGFRFGVKSSKSDVSFTAAEEEEETLPEELHAELMPK                |
| CPT8_At5g58782 | 28 | SLLSLLLLPCL----RPCFPKAGSLK-----NKKKIDKGTYYVVGEEET--PKELQRELMR           |
| CPT9_At5g58784 | 13 | AL---FLIPGLFISRRLNVPLS--LTNILRFIKI IASKYD-DEEERNEKRGTMGKEQK-RG---RNIMPK |
| CPT3_At2g17570 | 27 | -----RRSLFRVISMGPITP                                                    |
| CPT4_At5g60510 | 23 | -----RKFIKVLRVGPITP                                                     |
| CPT5_At5g60500 | 22 | -----RKFLFRVLCVGPITP                                                    |
| LEW1_At1g11755 | 48 | ----->                                                                  |

|                |    |                                                                        |
|----------------|----|------------------------------------------------------------------------|
| CPT1_At2g23410 | 73 | HVAFILDGNRRWA----KRALG--TTSQGHEAGAKRLIDIAELCFELGVHTVSAFAFSTENWGRDKIEI  |
| CPT2_At2g23400 | 73 | HVSFILDGNRRWA----KRDGL--TTAQGHEAGTKRIIEIAEVCFELGIHTVSAFAFSTENWGRDKFEV  |
| CPT6_At5g58780 | 73 | HVAVIMDGNRRWA----KRALG--LTSQGHEAGAKRLIEFSELCKLGIHTVSAFAFSTENWGRHKIEV   |
| CPT7_At5g58770 | 80 | HVAIIMDGNRWA----KNRGL--QPWDGHRAGVEALKEIVELCGKWGIQVLTVFASFSTDNWIRPRIEI  |
| CPT8_At5g58782 | 78 | HVAVIMDGNRRWA----KQTGL--LTSQGYEAGAKRLLEFADLCKLGINTVSAFAFSTENWGRHKIEV   |
| CPT9_At5g58784 | 73 | HVAVILDGNRRWA----EKRGL--GTSEGHEAGARRLMENAKDCFAMGTNTISLFAFSTENWERPEDEV  |
| CPT3_At2g17570 | 42 | HIAFIMDGNRRYA----KKCGL--LDGSGHKAGFSALMSMLQCYELGIKYVTIYAFSIDNFRRKPEEV   |
| CPT4_At5g60510 | 38 | NISFIMDGNRRFA----KKRNLEGLD-AGHRAGFISVKYILQYCKEIGVPYVTLTAFGMDNFKRGPEEV  |
| CPT5_At5g60500 | 37 | NISFIMDGNRRFA----KKHNLIGLD-AGHRAGFISVKYILQYCKEIGVPYVTLTAFGMDNFKRGPEEV  |
| LEW1_At1g11755 | 48 | SYAITLGLNKKYGSIDLEKLRCLAVVVDIEAAQDVANVVELLQWLTTIGVKQVGLF----DSQGLLKKSK |

I

II

III

|                |     |                                                                        |
|----------------|-----|------------------------------------------------------------------------|
| CPT1_At2g23410 | 136 | DNLM-----SLIQHYRNS-----N---IKFFHRESEVRVSVIGNKTKIPESLLKEIH-EIEEATKGYKNK |
| CPT2_At2g23400 | 136 | KCLM-----SLFNHYL-KS-----N---IQYFQRKEVRVSVIGNKTKIPESLLKEIH-EIEEATKATR-- |
| CPT6_At5g58780 | 136 | KCLM-----SLIQHYL-KS-----K---IQYFQREETRVSVIGNLTKIPESLLRTVQ-EIEEATRSYKKK |
| CPT7_At5g58770 | 143 | DFLF-----SLFERSL-KT-----E---FQNLAKNNVRISIIGDSSKLPKSLLRVIN-EVEEVTKNNTRL |
| CPT8_At5g58782 | 141 | KCLM-----YLFQRYLKS-----IQFFQSKAIRVSVIGNLAKIPESLLRTVH-ELEEATKSYYKK      |
| CPT9_At5g58784 | 136 | KCLM-----ALFEKYL-AS-----D---MPYLRSDKIKISVIGNRTKLPELGLIE-EVEEATKSIEGK   |
| CPT3_At2g17570 | 105 | ESVM-----DLMLEKIKSL---LEK---ESIVHQYGIRVYFIGNLALLNDQVRAAE-KVMKATAKNSRV  |
| CPT4_At5g60510 | 102 | KCVM-----DLMLEKVELT---IDQ---AVSGNMNGVRIIFAGDLNSLNERFRAATK-KLMELTEENRDL |
| CPT5_At5g60500 | 101 | KCVM-----DLMLEKVELA---IDQ---AVSGNMNGVRIIFAGDLNSLNEHFRAATK-KLMELTEENRDL |
| LEW1_At1g11755 | 114 | DLILETVPGSMLLEEIEKDVADPGKRIALEFISSSDNKEAVMKAANILLQRYLKSSHPEDDKG-----   |

<.....

|                |     |                                                                      |
|----------------|-----|----------------------------------------------------------------------|
| CPT1_At2g23410 | 192 | HLIMAVDYSKGFDMHACK-SLVKKSEK-----GLIREEDVDEALIERELL                   |
| CPT2_At2g23400 | 189 | -----ISISSW-HLVKKSEK-----GLIREEDVDEALIERELL                          |
| CPT6_At5g58780 | 191 | HLILAIDYSGRLDILRACK-SIVKKSEK-----GLIREEDVDEALIERELL                  |
| CPT7_At5g58770 | 198 | QLIVAVGYSGKYDVLQACR-GIARRVKD-----GEIEVEEIDERLIEEELE                  |
| CPT8_At5g58782 | 196 | HLILAIDYSGRFDILGAC-KNIVKKSEQ-----GLIREEDVDETLEFERELQ                 |
| CPT9_At5g58784 | 191 | NLIIAIDYSGRYDILQACK-SLANKVKD-----GLIQVEDINEKAMEKELL                  |
| CPT3_At2g17570 | 163 | VLLICIAYNSTDEIVQAVKSKCINKSDNIEASNYKHEDSDSDIEGTMENQEKKIQLVDIEENMQ---- |
| CPT4_At5g60510 | 160 | IVVVCVAYSTSVEIVHAVRSCVRKSKT-----GDGSS-----ALELSDIEECMY-----          |
| CPT5_At5g60500 | 159 | IVVVCVAYSTSLEIVHAVRKSCVRKCTN-----GDDLIV-----LLELSDVEECMY-----        |
| LEW1_At1g11755 | 177 | -----EDFFTESHLDNALR                                                  |

IV

|                |     |                                                                                      |
|----------------|-----|--------------------------------------------------------------------------------------|
| CPT1_At2g23410 | 237 | TNCSDFPSPDLMIRTSGEQRISNFFLWQLAYSELFFSPVFWPDFDKDKLLEALASYQRRER <sup>RFG</sup> CRV---  |
| CPT2_At2g23400 | 221 | TNCSDFPSPDLMIRTSGEQRISNFFLWQLAYTELFYSPVLWPDFDKDKLLEALASYQGRER <sup>RFG</sup> CRV---  |
| CPT6_At5g58780 | 236 | TNCTEFPSPDLLIRTSGEQRISNFFLWQLAYTELFYSPVLWPDFDKDKLLEALVSYQRRER <sup>RFG</sup> CRV---  |
| CPT7_At5g58770 | 243 | TNCTEFPSPDLLIRTSGEQRLVSNFFLWQLAYTELFFAQELWPDFGRSGFIEALMSFQQRQR <sup>RFG</sup> GRKS-- |
| CPT8_At5g58782 | 241 | TRCTEFPSPDLLIRTSGEQRISNFFLWQLAYTEFFSPVLWPDFDKQKFIEALVSYQRRDR <sup>RFG</sup> SRL---   |
| CPT9_At5g58784 | 236 | TKCFEFPNPDLLIRTSGEQRISNFFLWQSAYTELYFPTVLWPDFGEAEYLEALTWYQQRQR <sup>RFG</sup> RRV---  |
| CPT3_At2g17570 | 228 | --MSVAPNPDILIRSSGETRLSNFFLWQTGNTQLCSPAALWPEIGLRHLLWAILNFQRNHSYLEKRRKQL               |
| CPT4_At5g60510 | 205 | --TSVVPVVDLVVRTGGGDRLSNFMWTQTSRALLHRTEALWPELGLWHLVWAILKFQRMQDYLTQKKKKLH              |
| CPT5_At5g60500 | 204 | --TSIVPVVDLVIRTGGGDRLSNFMWTQTSRSLHRTEALWPELGLWHLVWAILKFQRMQDYLTQKKKKLD               |
| LEW1_At1g11755 | 191 | VVGENVHPDLLLLVYGPISRHLGFPWRLRYTEIVHMGTL-KYMRYSLLKAIHKFTGVHQ <sup>NYGT</sup> -----    |

V

RXG  
NXG

**Figure S1.** Multiple sequence alignment for *Arabidopsis* cis-PTs listed in Table 1. Highly conserved regions are highlighted in gray. They are not present in CPT binding protein LEW1. Motifs essential for binding of substrate are highlighted in black. RXG (eventually NXG) motif highlighted in green is critical for catalysis [65] and is missing in heteromeric CPT enzymes.
